# Supplementary material for: Recall by genotype and cascade screening for familial hypercholesterolemia in a population-based biobank from Estonia
Source: PubMed Central journal article supplement (PMC6443485; doi:10.1038/s41436-018-0311-2), 2018-10-01
Supplement: NIHMS994784-supplement-Table_S1.pdf [file NIHMS994784-supplement-Table_S1.pdf]

Table S1. Baseline characteristics of high-coverage sequenced individuals at Estonian Genome Center, University of Tartu.

|                             | WGS          | WES          | Sub-cohort of non-carriers** |
|-----------------------------|--------------|--------------|------------------------------|
| N                           | 2,240        | 2,356        | 978                          |
| Age (years)                 | 46.6 (17.7)  | 30.6 (7.4)   | 53.4 (15.8)                  |
| Women                       | 1227 (51%)   | 1017 (43%)   | 490 (50%)                    |
| Blood pressure (mmHg)       |              |              |                              |
| systolic                    | 128.9 (18.5) | 118.2 (12.7) | 132.7 (19.6)                 |
| diastolic                   | 78.9 (11.5)  | 73.5 (9.0)   | 83.2 (11.7)                  |
| LDL-C (mmol/L)*             | 3.26 (0.96)  | NA           | 3.56 (0.98)                  |
| Diabetes Mellitus           | 108 (4%)     | 0 (0%)       | 51 (5%)                      |
| Body mass index             | 26.9 (5.5)   | 21.8 (2.8)   | 27.9 (5.5)                   |
| Current smokers             | 641 (26%)    | 909 (39%)    | 179 (18%)                    |
| Lipid-lowering medication   | 152 (7%)     | 0 (0%)       | 93 (10%)                     |
| Antihypertensive medication | 689 (28%)    | 61 (3%)      | 369 (38%)                    |

Data are number (%) or mean (SD). \*LDL-C levels for the WGS sample set was available for 2,252 individuals; VAP-based LDL-C measurements were scaled to correspond to the conventionally measured LDL-C values using linear regression-based coefficients. LDL-C levels were unavailable for the whole WES sample set and measured for FH-associated variant carriers only. \*\*Sub-cohort of non-carriers for LDL-C level association analysis was formed based on the WGS sample set to exclude false-negatives in the controls and using conventionally measured LDL-C values for LDL-C measurement consistency. WGS - whole-genome sequencing; WES - whole-exome sequencing.
